# Supplementary figures and images for: A Pilot Immunohistochemical Study Identifies Hedgehog Pathway Expression in Sinonasal Adenocarcinoma
Source: MDPI journal article supplement (doi:10.3390/ijms25094630), 2024-04-24

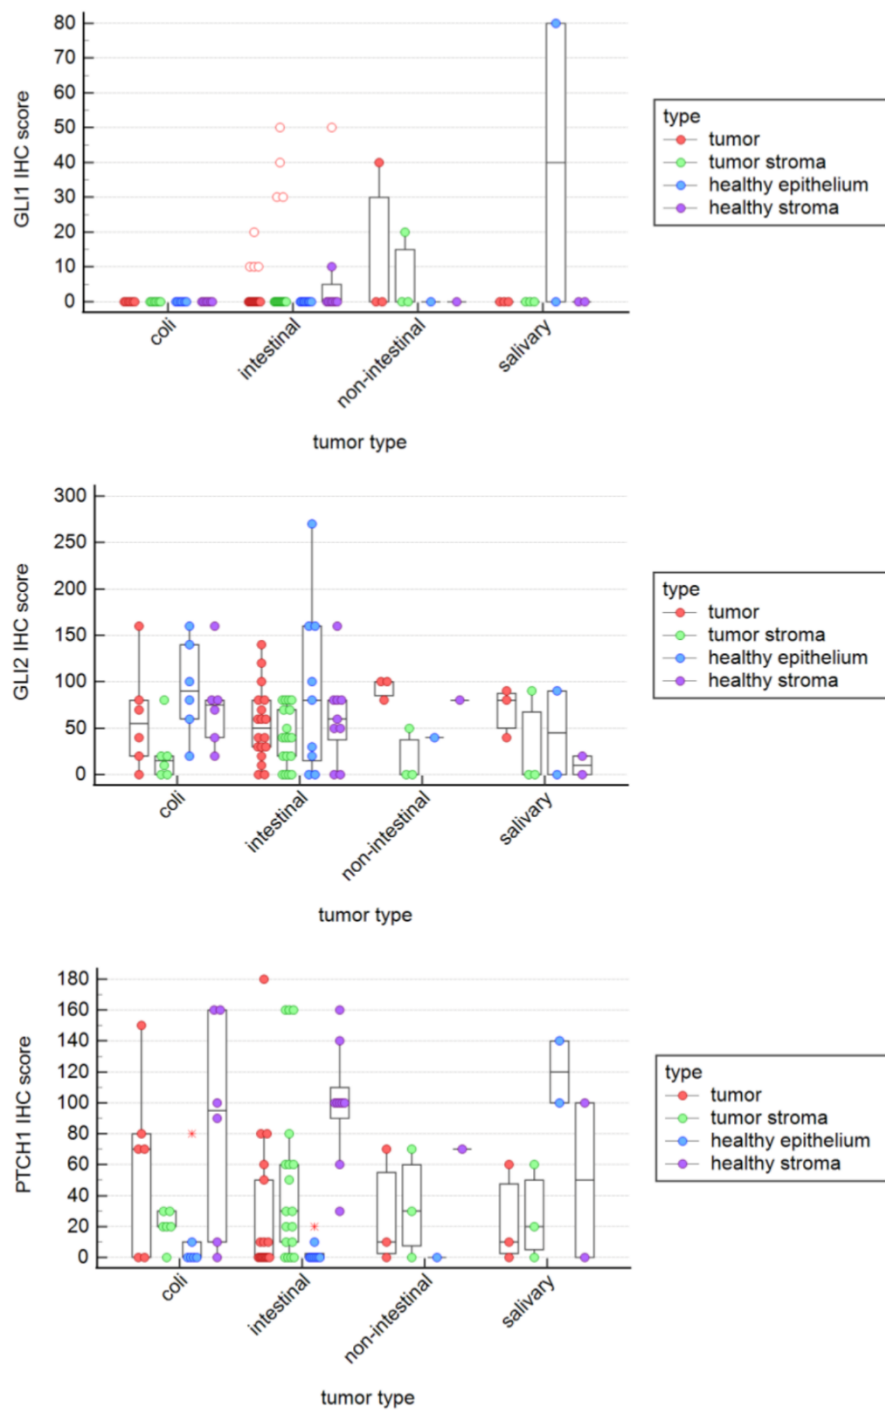

**Figure S1.** GLI1, GLI2 and PTCH1 staining scores in all analyzed samples.

Supplement: s1 [file s1]
